# Supplementary material for: Mapping the evidence of intimate partner violence among women living with HIV/AIDS in sub-Saharan Africa: a scoping review
Source: HighWire-hosted journal article supplement (doi:10.1136/bmjopen-2020-041326), 2021-05-01
Supplement: bmjopen-2020-041326supp001_data_supplement.pdf [file bmjopen-2020-041326supp001_data_supplement.pdf]

## Supplementary file 1: Search strategy

| Population                 | Concept                   | Keywords                                                                                                                                                                                   | Date          | No.found |
|----------------------------|---------------------------|--------------------------------------------------------------------------------------------------------------------------------------------------------------------------------------------|---------------|----------|
| Women living with HIV/AIDS | Intimate partner violence | ("intimate partner violence"[MeSH Terms] AND "women"[MeSH Terms]) AND HIV[Title] OR "domestic violence"[MeSH Terms] AND "africa"[MeSH Terms] AND ("2009/01/01"[PDAT] : "2019/04/01"[PDAT]) | 08 April 2019 | 750      |
